# Supplementary material for: Implementation fidelity of a clinical medication review intervention: process evaluation
Source: PubMed Central journal article supplement (PMC5984963; doi:10.1007/s11096-018-0615-y), 2018-03-20
Supplement: 11096_2018_615_MOESM2_ESM.pdf [file 11096_2018_615_MOESM2_ESM.pdf]

## Electronic supplementary material II

### Topic guide semi-structured interviews GP (and practice nurse)

**Objective:** What are the experiences of the GPs with the Opti-Med medication review proposed interventions and consultations?

#### I: Evaluation medication review proposed interventions and consultations

- Could you tell me a little about how the Opti-Med intervention was organized and implemented in your GP practice?
- What were your expectations beforehand of medication reviews, especially the feasibility and usefulness for you and the patient?
- How were the consultations with the patients?  
*Prompts:*
  - *what went good and what went wrong;*
  - *which problems were handled in the consultations;*
  - *were there differences between the first consultations and later on?*
- Were the proposed interventions from the expert teams comprehensible?  
*Prompts:*
  - *did you always agree with the proposed intervention?*
- What were the most common reasons to not follow up a proposed intervention?
- Could you tell me a little about the completeness of the medical and medication data on which the proposed interventions by the expert teams were based?
- In your opinion, what did you think of the external party, that did not know the patient, reviewed the medication?  
*Prompts:*
  - *expectations beforehand and opinion now?*
  - *pros and cons of not knowing the patient?*
- Could you tell me a little about the follow-up and monitoring of Opti-Med patients over time?
- Did you learn something about pharmacotherapy for elderly and did you implement these extra knowledge in practice?
- Did you contact medical specialist and/or pharmacists to consult on medication changes in the context of the Opti-Med study.
- Was the Opti-Med intervention indeed innovative for your GP practice?
- Can you mention other elements in the approach and execution of the Opti-Med medication reviews that contributed to high quality of efficient medication reviews or less qualitative or efficient medication reviews?  
*Prompts:*
  - *point of attention/improvement*
  - *Impact contextual factors (e.g. personnel changes)*

#### II: Target group

- In your opinion, is the current targeted patient group a useful group for medication reviews?  
*Prompts:*
  - *interesting/useful subgroups (polypharmacy, oldest old etc?)*

- In this study patients with geriatric problems (instability, immobility, incontinence and impaired cognition) were the target group and a new angle for the medication reviews. In your opinion, were these geriatric problems dealt by means of the medication reviews?

### III: Implementation in daily practice

- Do you think the Opti-Med method could be implemented in daily GP and pharmacy practice, and how?  
*Prompts:*
  - *feasibility/priority*
  - *organisation*
  - *role of practice nurses*
  - *cooperation*
  - *training/education*

## Topic guide focusgroup discussion expert teams

**Objective:** What are the experiences of the expert team members with the Opti-Med medication review analyses?

### I. Evaluation of the method of performing reviews; facilitators and barriers

- Could you tell me a little about using the structure of the medication analysis (STRIP)?  
*Prompts:*
  - *did you follow the individual steps of the STRIP guideline and helped that to improve quality and/or efficiency?*
  - *you start with assigning all medications to condition, then undertreatment, overtreatment etc?*
- Did you use the STOPP- and START criteria and/or Dutch GP guidelines (NHG).  
*Prompts:*
  - *this is mostly embedded in the STRIP-assistant, did you consult guidelines in addition?*
- Could you tell me a little about the knowledge you had before and after the training and the knowledge you derived from performing the medication reviews?  
*Prompts:*
  - *did you have sufficient knowledge and training to perform the medication reviews?*
- In your opinion, was the data complete provided to perform the medication reviews?  
*Prompts:*
  - *how often did it occur that essential information was missing to perform a good medication review, or possibly there was too much information?*
  - *in your opinion, were there possibly errors of data entry or in the original files from the GP or pharmacy.*
- How do you feel about the fact that you did not know the patient?
  - *cons and pros*
- What did you think of the cooperation and discussion between physician and pharmacist within the expert team?  
*Prompts:*
  - *what were your expectations beforehand, and how is this currently?*
  - *was there or was there no consensus?*
  - *complementary knowledge/skills/approach?*
- What did you think of drafting the pharmacotherapeutic treatment plan for the GP?
- What were important differences of Opti-Med compared to regular medication reviews (as far as your experiences reach)  
*Prompts:*
  - *structure*
  - *time-investment*
  - *quality*
- Can you mention other elements in the approach and execution of the Opti-Med medication reviews that contributed to high quality of efficient medication reviews or less qualitative or efficient medication reviews?  
*Prompts:*
  - *point of attention/improvement*

## II: Target group

- In your opinion, is the current targeted patient group a useful group for medication reviews?  
*Prompts:*
  - *interesting/useful subgroups (polypharmacy, oldest old etc?)*
- To what extent could you take into account the geriatric problems with respect to medication changes or other proposed interventions?

## III: Surplus value patient information

- According to you, what is the surplus value of the patient information to tailor the pharmacotherapeutic treatment plan?  
*Prompts:*
  - *what type of interventions were proposed?*
- Is this input comparable to information which you would derive from a face-to-face contact with the patient?

## IV: Implementation in daily practice

- Do you think the Opti-Med method could be implemented in daily GP and pharmacy practice, and how? Especially the use and organization of external expert teams?  
*Prompts:*
  - *what form could we use for teams?*
  - *who has which responsibility*
  - *role of elderly care specialist*
  - *training/education*

## V: Evaluation of STRIP-assistant

- To what extent does the use of the STRIP-assistant, contributed to high quality and efficient medication reviews? Do you have points for improvement for the STRIPA decision-support web application facilitating the pharmacotherapeutic analysis?
